# Supplementary material for: Synthesis and characterization of Co(ii) and Fe(ii) peptide conjugates as hydrolytic cleaving agents and their preferential enantiomeric disposition for CT-DNA: structural investigation ofl-enantiomers by DFT and molecular docking studies
Source: Royal Society of Chemistry journal article supplement (doi:10.1039/c5ra15742k), 2015-01-01
Supplement: c5ra15742k1.pdf [file c5ra15742k1.pdf]

## Supplementary Information

### Synthesis and characterization of Co(II) and Fe(II) peptide conjugates as hydrolytic cleaving agents and their preferential enantiomeric disposition for CT-DNA: Structural investigation of L-enantiomers by DFT and molecular docking studies.

Sabiha Parveen, Mohammad Usman, Sartaj Tabassum and Farukh Arjmand\*

Department of Chemistry, Aligarh Muslim University, Aligarh 202002, Uttar Pradesh, India

Corresponding author. Tel.: +91 5712703893.

E-mail address: [farukh\\_arjmand@yahoo.co.in](mailto:farukh_arjmand@yahoo.co.in) (F. Arjmand).

| Complex L-1<br>Bond | Bond length | Complex L-2<br>Bond | Bond length |
|---------------------|-------------|---------------------|-------------|
| O(9)–Co(25)         | 1.77012     | O(9)–Fe(25)         | 1.747       |
| N(10)–Co(25)        | 1.97694     | N(10)–Fe(25)        | 2.001       |
| Co(25)–O(26)        | 1.86435     | Fe(25)–O(26)        | 1.857       |
| Co(25)–N(35)        | 1.86435     | Fe(25)–N(35)        | 1.796       |
| Co(25)–O(50)        | 2.0724      | Fe(25)–O(50)        | 2.097       |
| Co(25)–O(51)        | 2.02395     | Fe(25)–O(51)        | 2.127       |

**Table. S1** Selected bond lengths for complexes L-1 and L-2.

| Complex L-1<br>Bond | Bond angle | Complex L-2<br>Bond | Bond angle |
|---------------------|------------|---------------------|------------|
| N(10)–Co(25)–O(50)  | 92.5050    | N(10)–Fe(25)–O(50)  | 89.6601    |
| O(50)–Co(25)–O(26)  | 80.6012    | O(50)–Fe(25)–O(26)  | 82.8500    |
| O(26)–Co(25)–N(35)  | 87.2324    | O(26)–Fe(25)–N(35)  | 87.0918    |
| N(35)–Co(25)–N(10)  | 100.1184   | N(35)–Fe(25)–N(10)  | 100.4485   |
| N(10)–Co(25)–O(51)  | 91.27995   | N(10)–Fe(25)–O(51)  | 90.1809    |
| O(51)–Co(25)–N(35)  | 58.872     | O(51)–Fe(25)–N(25)  | 91.7278    |
| O(51)–Co(25)–O(26)  | 90.8479    | O(51)–Fe(25)–O(26)  | 88.9407    |
| O(51)–Co(25)–O(50)  | 78.7635    | O(51)–Fe(25)–O(50)  | 75.0981    |
| O(51)–Co(25)–O(9)   | 169.0894   | O(51)–Fe(25)–O(9)   | 165.2265   |
| O(50)–Co(25)–N(35)  | 164.869    | O(50)–Fe(25)–N(35)  | 163.5028   |
| O(26)–Co(25)–N(10)  | 172.246    | O(26)–Fe(25)–N(10)  | 172.4323   |
| O(9)–Co(25)–O(50)   | 90.616     | O(9)–Fe(25)–O(50)   | 90.6419    |
| O(9)–Co(25)–O(26)   | 89.859     | O(9)–Fe(25)–O(26)   | 93.1555    |
| O(9)–Co(25)–N(35)   | 98.362     | O(9)–Fe(25)–N(35)   | 102.9781   |

**Table. S2** Selected bond angles for complexes L-1 and L-2.

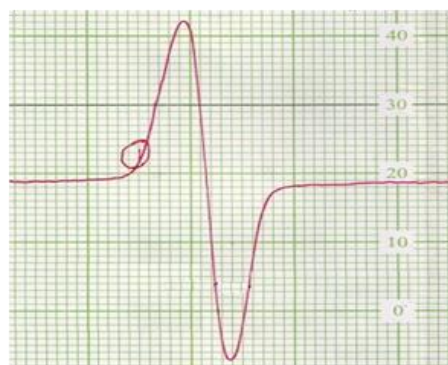

**Fig. S1** EPR spectra of **L-1** at 300 K in DMSO solution.

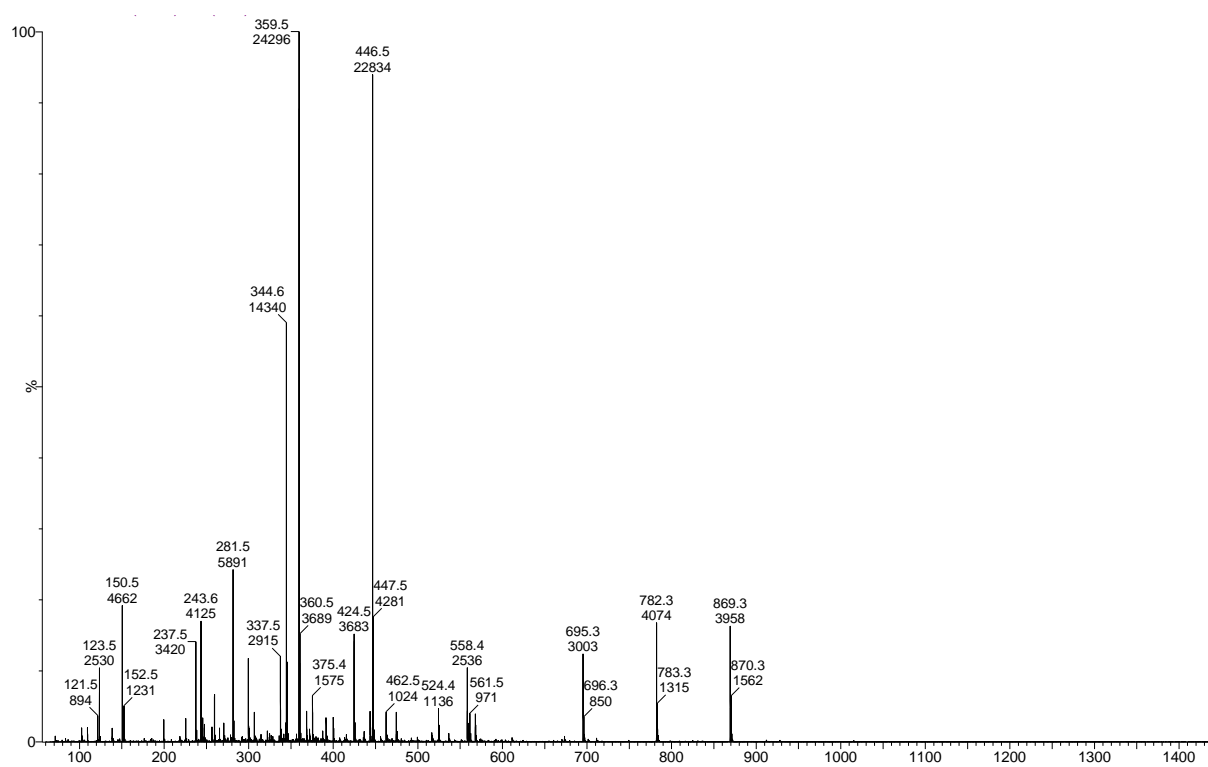

**Fig. S2(i)** ESI-Mass spectra of complex **L-1**.

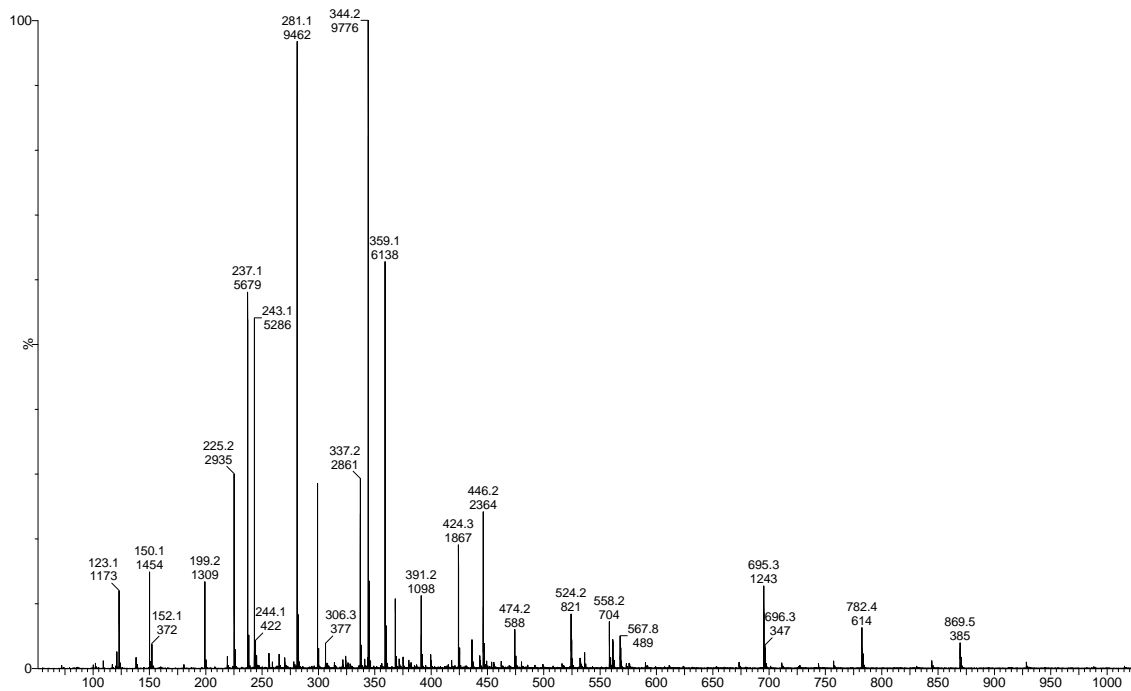

Fig. S2(ii) ESI-Mass spectra of complex D-1.

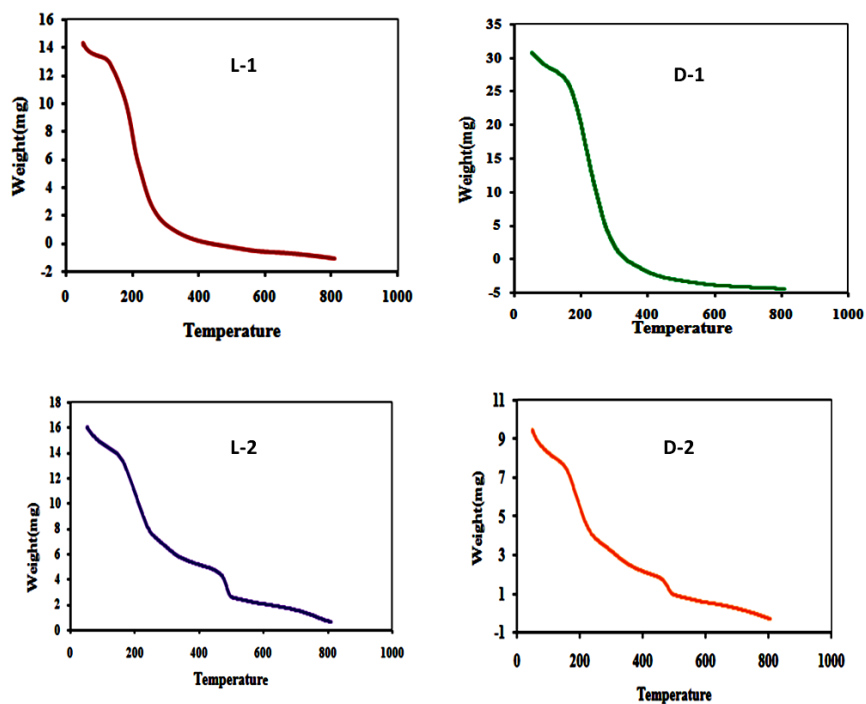

Fig. S3 TGA profile for complexes L/D-1 and 2.

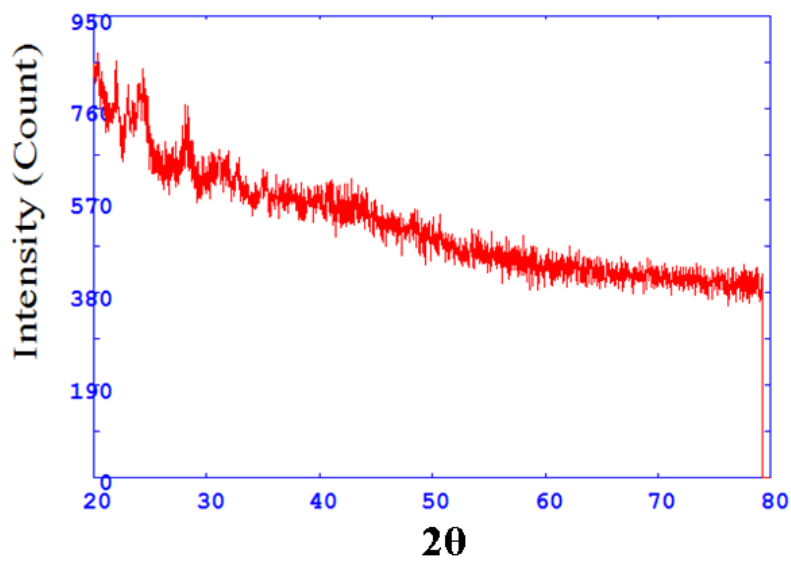

**Fig. S4** X-ray diffraction pattern of complex **L-1**.

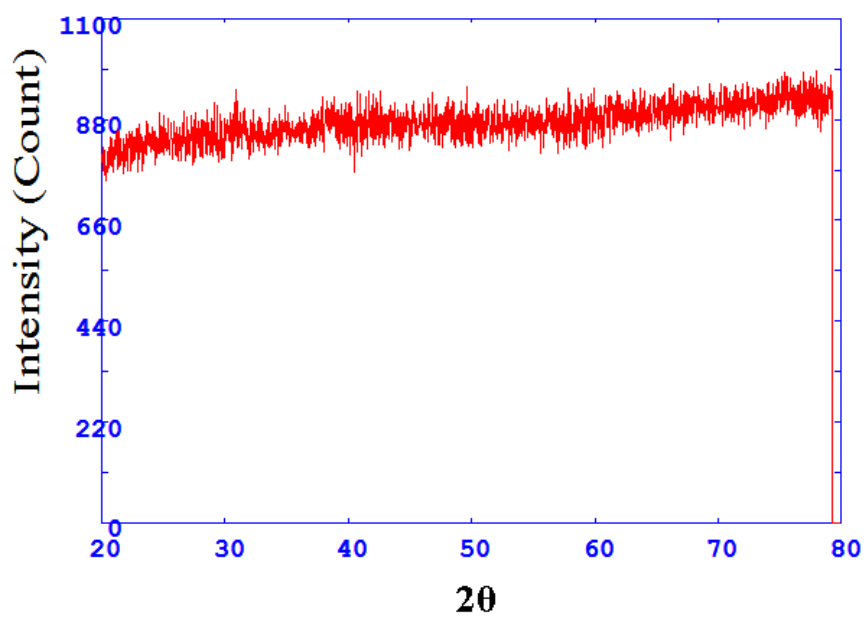

**Fig. S5** X-ray diffraction pattern of complex **L-2**.

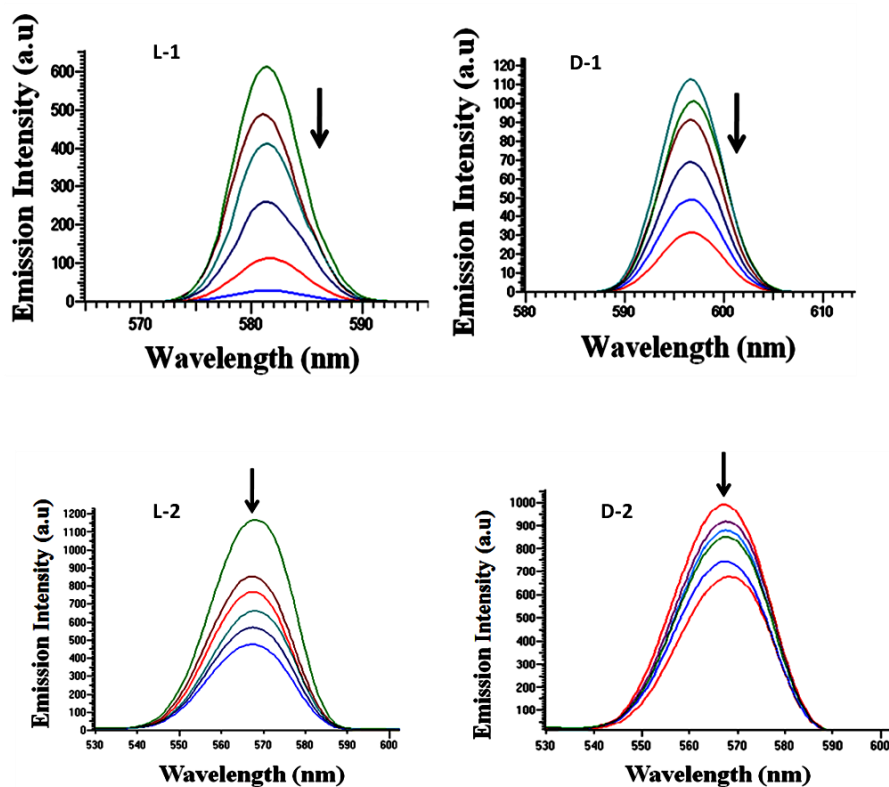

**Fig. S6** Fluorescence emission spectra of the EB–CT–DNA system in the absence and presence of complexes **L/D-1** and **2** at 25°C. [Complex], [EB], [DNA]= $10^{-5}$  M.

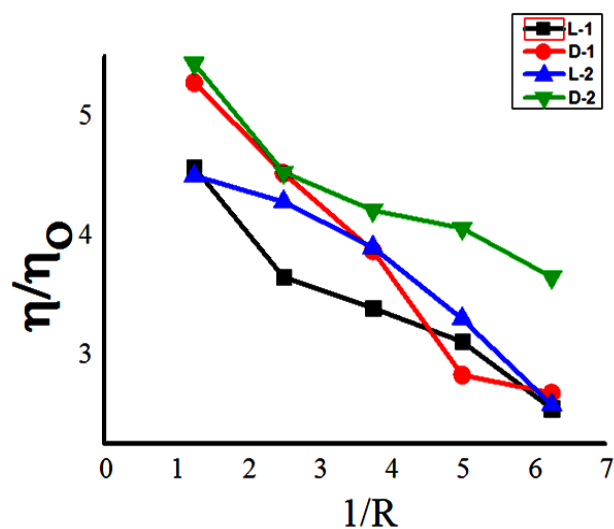

**Fig. S7** Effect of increasing amounts of complexes **L/D-1** and **2** on the relative viscosity ( $\eta/\eta_0$ ) of DNA in Tris–HCl buffer (pH 7.2).

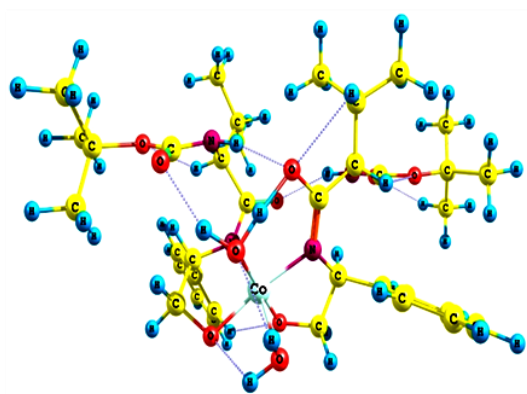

L-1

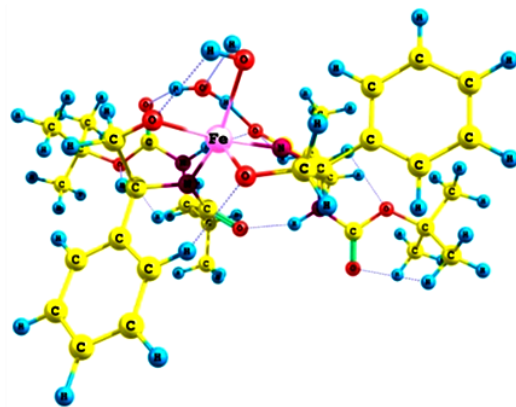

L-2

**Fig. S8** DFT optimized structure of complexes **L-1** and **L-2**.

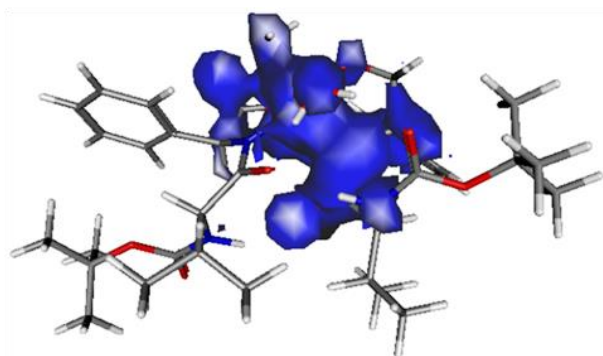

L-1

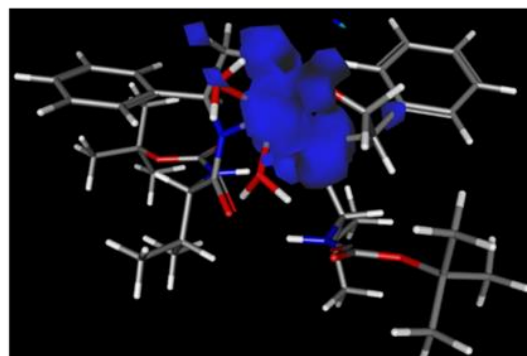

L-2

**Fig. S9** 3-D isodensity surface of Fukai MO nucleophilic susceptibility of **L-1** and **L-2**.
